# Supplementary material for: A (CH3)2CNHCH3PbBr3/CH3NH3PbBr3 core–shell heterostructure fabricated by an in situ a-site reaction for fast response 1D perovskite photodetectors
Source: Royal Society of Chemistry journal article supplement (doi:10.1039/d2cp01533a), 2022-01-01
Supplement: d2cp01533a1.pdf [file d2cp01533a1.pdf]

## Supporting Information

### **(CH<sub>3</sub>)<sub>2</sub>C=NHCH<sub>3</sub>PbBr<sub>3</sub>/CH<sub>3</sub>NH<sub>3</sub>PbBr<sub>3</sub> Core-Shell Heterostructure Fabricated by In-Situ A-Site Reaction for Fast Response 1D Perovskite Photodetectors**

*Wei Wang, Jie Zhao\*, Lin Jiang, Shaochao Liu, Li Wang\**

School of Physics and Materials Science, Nanchang University, Nanchang 330031,  
P.R. China

E-mail: [ncu915@outlook.com](mailto:ncu915@outlook.com) (J.Z.); [w1@ncu.edu.cn](mailto:w1@ncu.edu.cn) (L.W.)

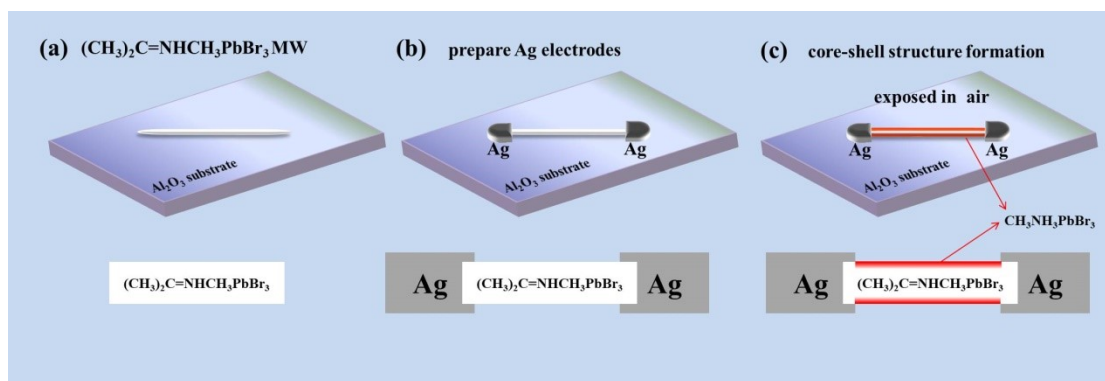

**Figure S1** The schematic diagram of the fabrication of  $(\text{CH}_3)_2\text{C}=\text{NHCH}_3\text{PbBr}_3/\text{CH}_3\text{NH}_3\text{PbBr}_3$  core-shell device.

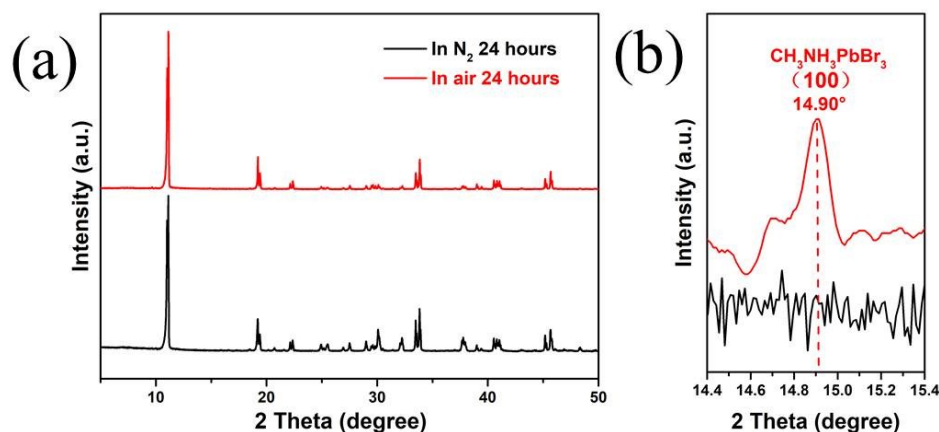

**Figure S2.** The XRD patterns of MWs in air and  $\text{N}_2$  with 1 atm, right is the enlargement from  $14.4^\circ$  to  $15.4^\circ$ .

In order to study the effect of water on the reverse transition, we put the fresh  $(\text{CH}_3)_2\text{C}=\text{NHCH}_3\text{PbBr}_3$  microwires in a vacuum device, evacuated first and then ventilate with nitrogen (1 atm), and store it for 24 hours. For comparison, some fresh microwires were exposed in air (relative humidity  $>80\%$ ) for 24h. The XRD results are shown in **Figure 10**, after 24 hours, the latter shows weak diffraction peaks at  $14.9^\circ$  corresponding to the (100) lattice planes of the  $\text{CH}_3\text{NH}_3\text{PbBr}_3$  cubic structure, but the former without  $\text{CH}_3\text{NH}_3\text{PbBr}_3$  perovskite signal peaks. This proves that water molecules played an important role in the reversible phase transition of  $(\text{CH}_3)_2\text{C}=\text{NHCH}_3\text{PbBr}_3$  to  $\text{CH}_3\text{NH}_3\text{PbBr}_3$ .

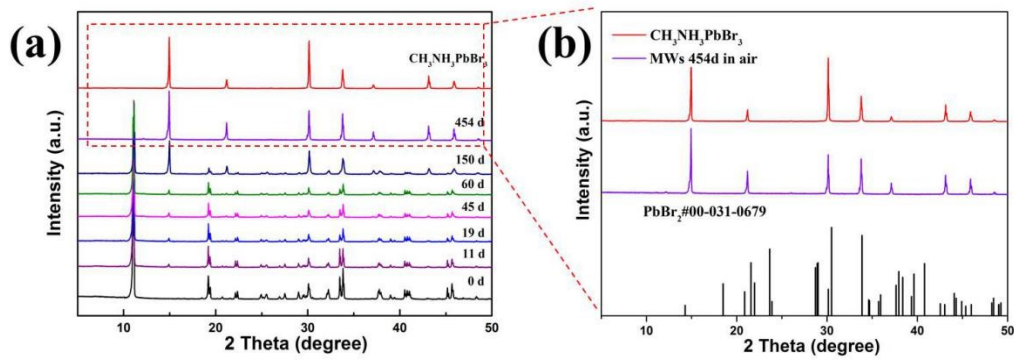

**Figure S3.** (a) The XRD pattern during core-shell MWs evolution. (b) XRD patterns of core-shell MWs stored after 454 days,  $\text{CH}_3\text{NH}_3\text{PbBr}_3$  powder, and the  $\text{PbBr}_2$  reference pattern #00-031-0679 (black bars).

The phase transition rate from  $(\text{CH}_3)_2\text{C}=\text{NHCH}_3\text{PbBr}_3$  to  $\text{CH}_3\text{NH}_3\text{PbBr}_3$  is very slow. The microwires cannot completely transform back to the  $\text{CH}_3\text{NH}_3\text{PbBr}_3$  phase, even if they are exposed in the air after 150 days. The reversed  $\text{CH}_3\text{NH}_3\text{PbBr}_3$  shell exhibits strong water stability over 454 days aging [1].

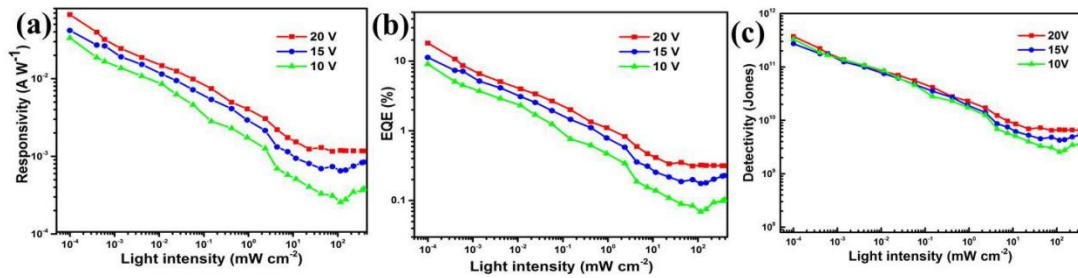

**Figure S4.** (a) Responsivity ( $R$ ), (b) external quantum efficiency ( $EQE$ ) and detectivity ( $D^*$ ) of the photodetectors. The wavelength of the light source is 460 nm, the illumination intensity is from  $1 \times 10^{-4}$  to  $389 \text{ mW cm}^{-2}$ , and the bias voltage is 10V, 15 V and 20 V.

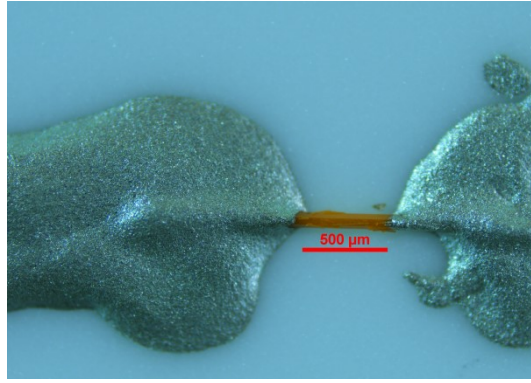

**Figure S5.** The optical microscopy image of single core-shell photodetector.

**Table S1.** Comparison of the key performance parameter for 1D  $\text{CH}_3\text{NH}_3\text{PbBr}_3$  perovskite photodetectors reported in literature and the present measurements

| Year | Device structure                                                                             | Responsivity<br>(mA/W)<br>@V bias/<br>light<br>intensity | Detectivity<br>(Jonse)<br>@V bias | EQE<br>(%)<br>/Gain | On/off ratio /<br>light intensity             | Response<br>Speed(ms)<br>(rise/decay) | Ref |
|------|----------------------------------------------------------------------------------------------|----------------------------------------------------------|-----------------------------------|---------------------|-----------------------------------------------|---------------------------------------|-----|
| 2015 | Au/ $\text{CH}_3\text{NH}_3\text{PbBr}_3$ NW<br>@ $\text{TiO}_2$ @ $\text{P}_3\text{HT}$ /Au | -                                                        | -                                 | -                   | 61.9/<br>27.5 $\text{mW cm}^{-2}$             | 120/86                                | [2] |
| 2018 | InGa/ $\text{CH}_3\text{NH}_3\text{PbBr}_3$ MW/InGa                                          | 525@ 2V/-                                                | -                                 | -                   | -                                             | 407/895                               | [1] |
| 2019 | Au/ $\text{CH}_3\text{NH}_3\text{PbBr}_3$ NW/Au                                              | 2100@2V/-                                                | $1.2 \times 10^{12}$              | -                   | $5 \times 10^3$ /<br>83.3 $\text{mW cm}^{-2}$ | 900/200                               | [3] |
| 2019 | Au/ $\text{CH}_3\text{NH}_3\text{PbBr}_3$ NP@Si<br>NW/Au                                     | 223@2V/50<br>$\text{mW cm}^{-2}$                         | $7.2 \times 10^{10}$              | -                   | -                                             | 320/280                               | [4] |
|      | Ag/ $(\text{CH}_3)_2\text{C}=\text{NHCH}_3\text{PbBr}_3$ -                                   | 66.8@20V/                                                | $3.7 \times 10^{11}$              | 18.0                | 3428/                                         | 2.8/0.8                               | Our |

|  |                                                         |                         |  |  |                          |  |      |
|--|---------------------------------------------------------|-------------------------|--|--|--------------------------|--|------|
|  | CH <sub>3</sub> NH <sub>3</sub> PbBr <sub>3</sub> NW/Ag | 0.1 μW cm <sup>-2</sup> |  |  | 76.1 mW cm <sup>-2</sup> |  | work |
|--|---------------------------------------------------------|-------------------------|--|--|--------------------------|--|------|

NWs = Nanowires; NPs = Nanoplatelets; '-' = Not Given

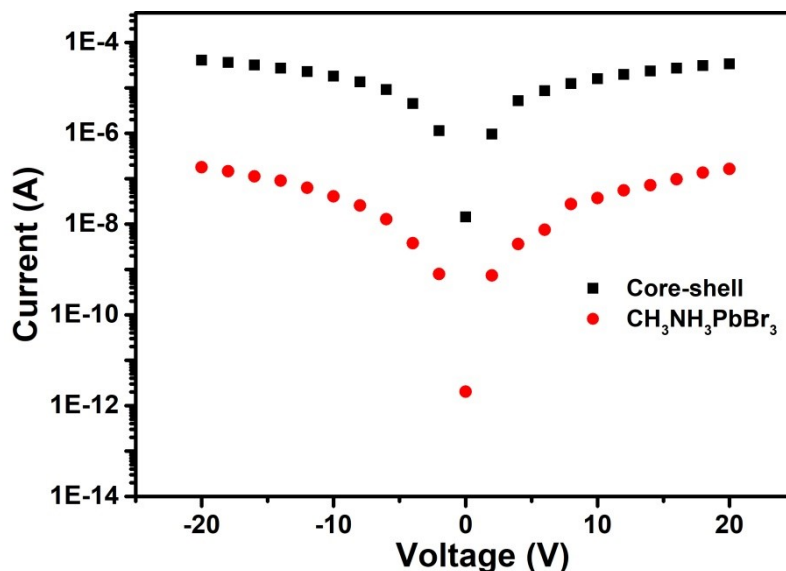

**Figure S6.** The I-V of the core-shell MW and CH<sub>3</sub>NH<sub>3</sub>PbBr<sub>3</sub> MW based photodetector device measured under 460 nm wavelength illumination, 20V bias.

### Supplementary Notes

#### Calculation of figures of merit of (CH<sub>3</sub>)<sub>2</sub>C=NHCH<sub>3</sub>PbBr<sub>3</sub>/CH<sub>3</sub>NH<sub>3</sub>PbBr<sub>3</sub> hetero-structured microwire photodetectors (HMPs)

To evaluate photoresponse characteristics, several parameters need to be determined. Although certain applications require different features, the key figure-of-merit parameters in photodetectors are the responsivity ( $R$ ), external quantum efficiency ( $EQE$ ) and specific detectivity ( $D^*$ ).

The  $R$  is defined as the ratio of photocurrent to the incident-light intensity, which calculated using the following formula [5]:

$$R = \frac{\Delta I}{PS}$$

where  $\Delta I$  is the difference between the light current and dark current ( $\Delta I = I_{\text{on}} - I_{\text{off}}$ ),  $P$  is the irradiance power density, and  $S$  is the effective illuminated area.

The  $EQE$  indicates the photon-electron conversion efficiency and is calculated as following [6]:

$$EQE = R \frac{hc}{\lambda q}$$

where  $R$  is the responsivity,  $h$  the Planck constant,  $c$  the velocity of light,  $q$  the elementary charge, and  $\lambda$  the wavelength of incident light.

The  $D^*$ , the minimum signal that can be detected of the photodetector. If considering that the noise current is dominated by shot noise in the dark current,  $D^*$  can be simply expressed as:

$$D^* = R/(2eI_d)^{1/2}$$

where  $e$  is the absolute value of electron charge ( $1.6 \times 10^{-19}$  Coulomb), and  $I_d$  the dark current density

### Supplementary References:

- 1 F. Chen, C. Xu, Q. Xu, Y. Zhu, F. Qin, W. Zhang, Z. Zhu, W. Liu and Z. Shi, *ACS Appl. Mater. Inter.*, **2018**, *10*.
- 2 S. F. Zhuo, J. F. Zhang, Y. M. Shi, Y. Huang and B. Zhang, *Angew. Chem.Int. Edit.*, **2015**, *54*, 5693-5696.
- 3 K. K. Ren, J. Wang, K. Liu, Y. B. Huang, Y. Sun, M. Azam, P. Jin, Z. J. Wang, S. C. Qu and Z. G. Wang, *RSC Adv.*, **2019**, *9*, 19772-19779.
- 4 J. Ghosh, R. Ghosh and P. K. Giri, *ACS Appl. Mater. Interfaces*, **2019**, *11*, 14917-14931.
- 5 M. Cao, J. Y. Tian, Z. Cai, L. Peng, L. Yang and D. C. Wei, *Appl. Phys. Lett.*, **2016**, *109*, 4.
- 6 B. W. H. Baugher, H. O. H. Churchill, Y. F. Yang and P. Jarillo-Herrero, *Nat. Nanotech.*, **2014**, *9*, 262-267.
